# Supplementary material
Source: Springer Nature journal article supplement (https://www.springermedizin.de/resource/supplementary/12993_2012_453_MOESM3_ESM.pdf/9617796)

- 2 M NaCl + saline
- ▼ 2 M NaCl + baclofen (1.0 nmol)
- 2 M NaCl + baclofen (0.5 nmol)

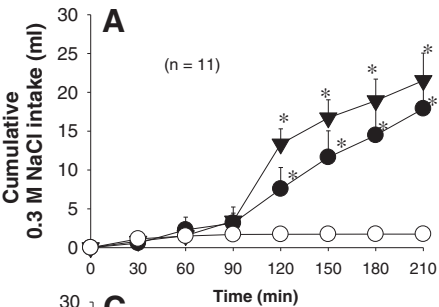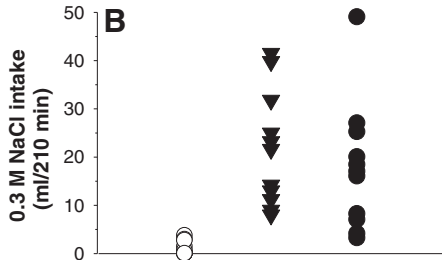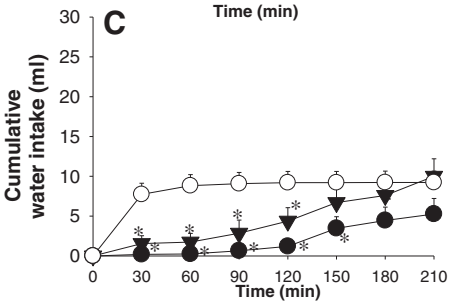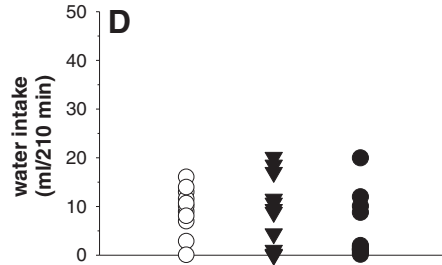

Supplement: MOESM3 [file 9617796]
